# Supplementary material
Source: Springer Nature journal article supplement (https://www.springermedizin.de/resource/supplementary/12931_2010_1054_MOESM3_ESM.pdf/9425532)

Total cells

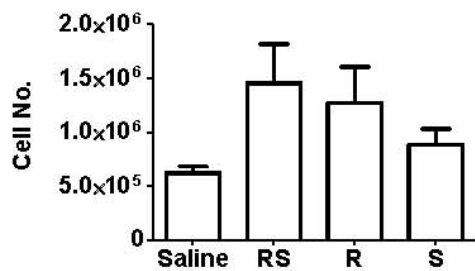

Cell diff %

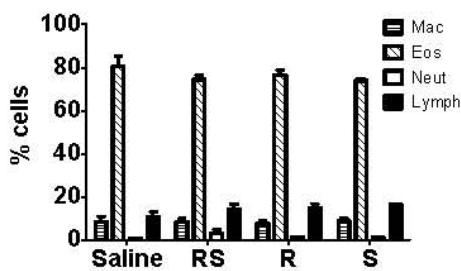

TNF-alpha

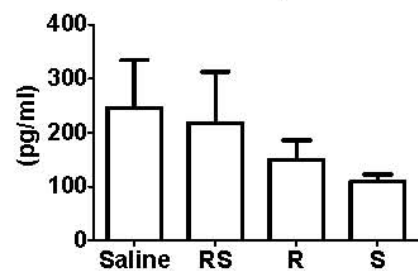

IL-4

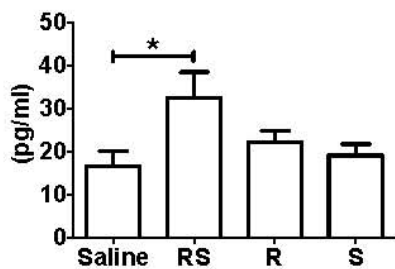

IL-5

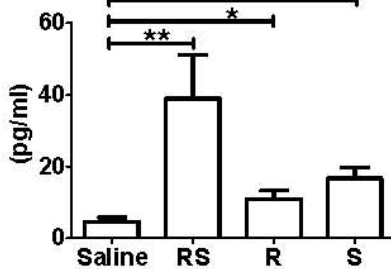

IL-13

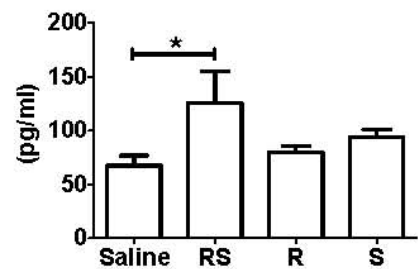

Eotaxin

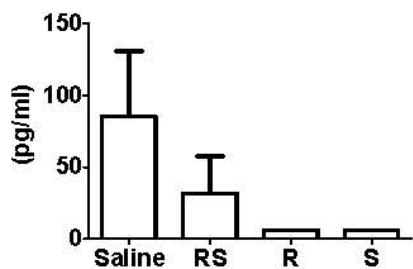

IL-12p40

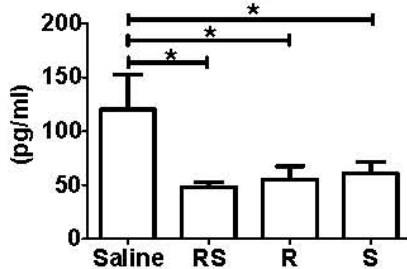

KC

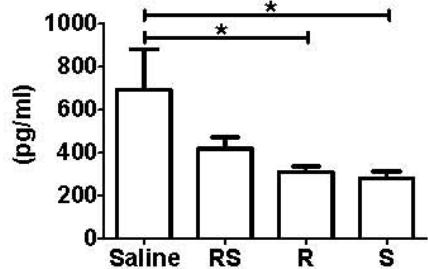

PAFS stain

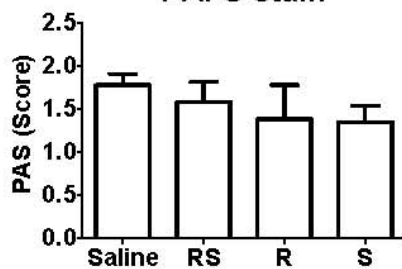

CCSP stain

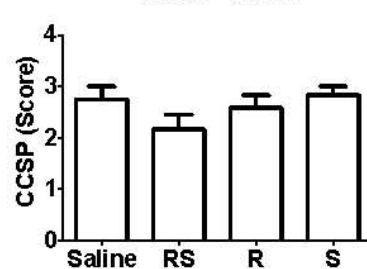

BALF protein

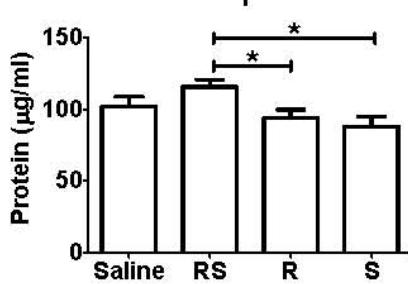

BALF IgG1

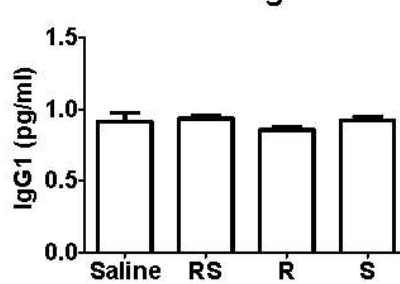

Supplement: MOESM3 [file 9425532]
